# Supplementary material
Source: publisher figshare collection journal article supplement (https://karger.figshare.com/articles/dataset/_/6989126)

**Supplementary Figure S2.** Bar chart of proportion of patients according to the year of begin of second line treatment.

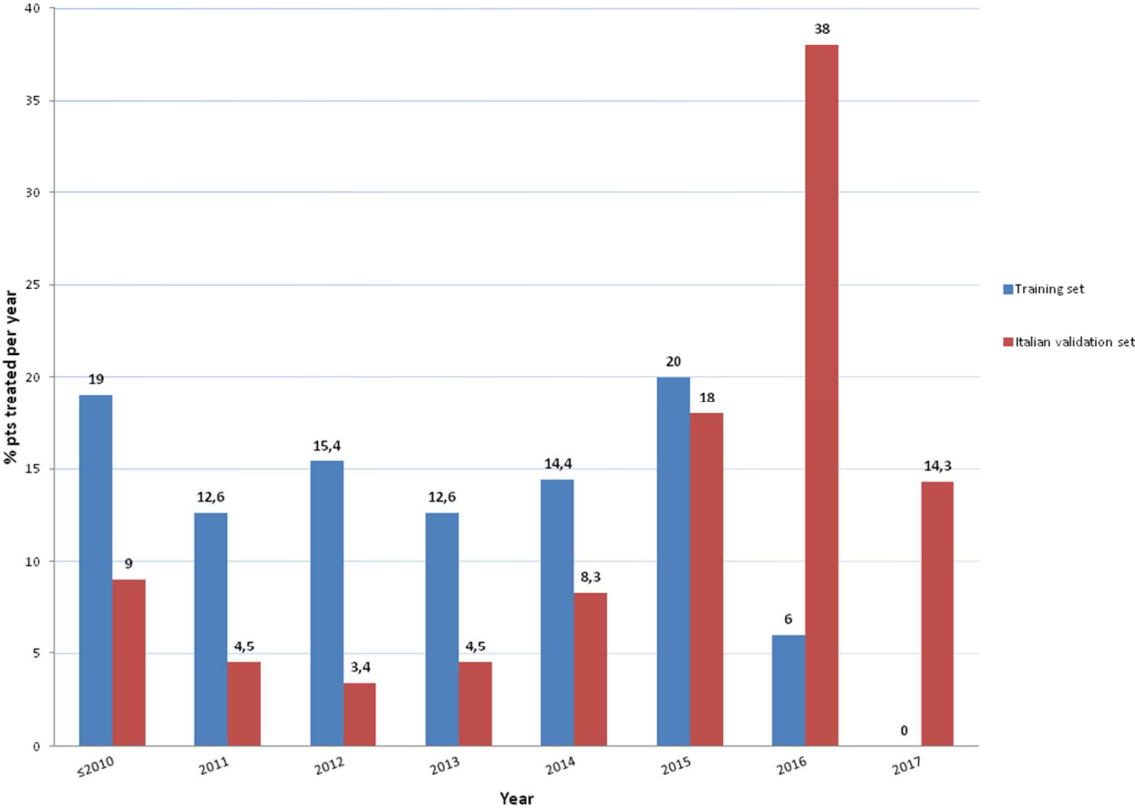

Supplement: Supplementary file 1 [file 1]
