# Supplementary material
Source: publisher figshare collection journal article supplement (https://karger.figshare.com/articles/dataset/_/6989126)
Supplement: Supplementary file 2 [file 1]

**Supplementary Table S1.** Random forest relative importance p values of covariates calculated by applying a permutation procedure, without and with false discovery rate adjustment.

| <b>Covariates</b>                       | <b>Permutation p value</b> | <b>False discovery rate adjusted permutation p value</b> |
|-----------------------------------------|----------------------------|----------------------------------------------------------|
| <b>ECOG performance status</b>          | <b>&lt;0.0001</b>          | <b>&lt;0.0001</b>                                        |
| <b>Neutrophils-to-lymphocytes ratio</b> | <b>&lt;0.0001</b>          | <b>&lt;0.0001</b>                                        |
| <b>Peritoneal involvement</b>           | <b>0.013</b>               | <b>0.069</b>                                             |
| First line progression-free survival    | 0.031                      | 0.124                                                    |
| Primary tumor resection                 | 0.078                      | 0.250                                                    |
| Presentation of metastases              | 0.117                      | 0.312                                                    |
| 1st line objective response             | 0.138                      | 0.315                                                    |
| Extra-regional lymph nodes              | 0.210                      | 0.381                                                    |
| Primary tumor site                      | 0.227                      | 0.381                                                    |
| LDH                                     | 0.238                      | 0.381                                                    |
| Lauren's histotype                      | 0.346                      | 0.503                                                    |
| Lung metastases                         | 0.516                      | 0.664                                                    |
| Patient age                             | 0.579                      | 0.664                                                    |
| Liver metastases                        | 0.623                      | 0.664                                                    |
| Number of metastatic sites              | 0.631                      | 0.664                                                    |
| Sex                                     | 0.664                      | 0.664                                                    |
