# Supplementary material
Source: publisher figshare collection journal article supplement (https://karger.figshare.com/articles/dataset/_/6989126)

Supplementary Figure S1. Flow diagram of patients included in the study.

DEVELOPING SET

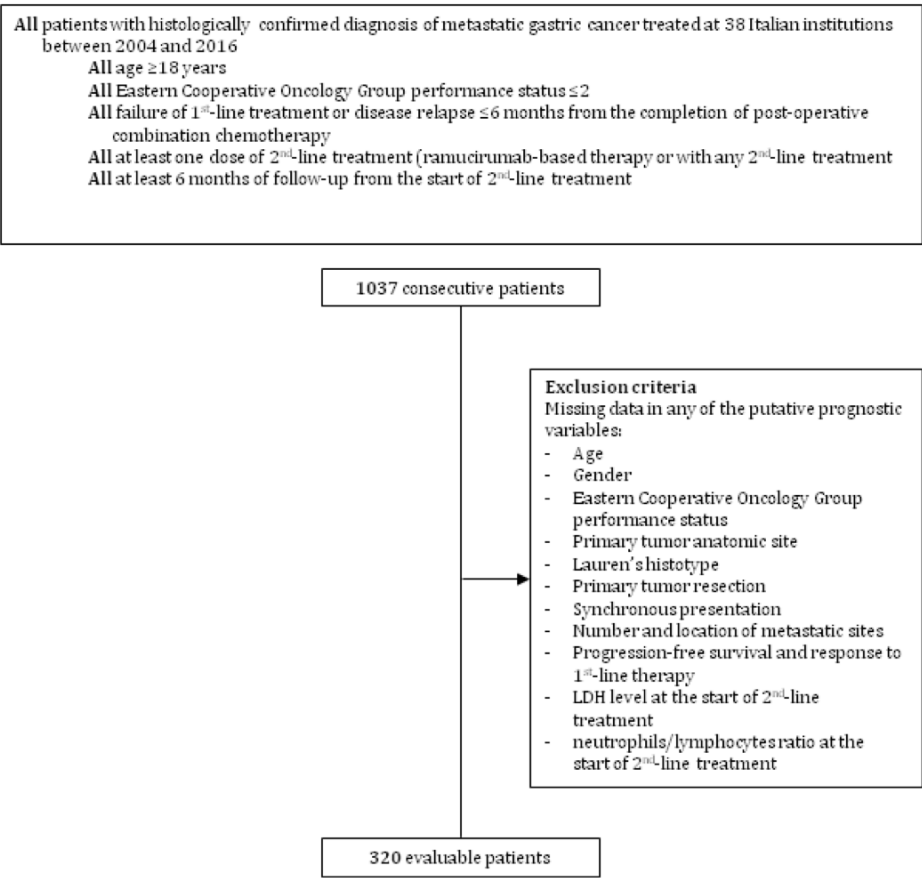

VALIDATING SETS

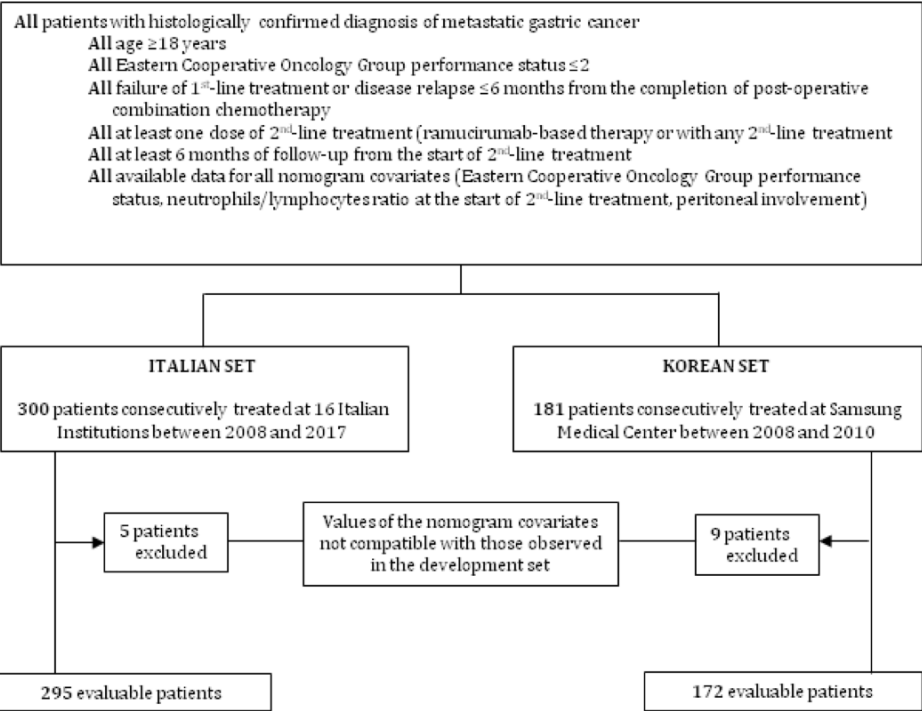

Supplement: Supplementary file 3 [file 1]
