# Supplementary material
Source: publisher figshare collection journal article supplement (https://karger.figshare.com/articles/dataset/_/6989126)
Supplement: Supplementary file 4 [file 1]

**Supplementary Figure S3.** Nomogram covariate scoring system.

| <b>Ecog PS</b>           | <b>Points</b> | <b>N/L ratio</b> | <b>Points</b> |
|--------------------------|---------------|------------------|---------------|
| 0                        | 0             | 0                | 0             |
| 1                        | 32            | 6                | 23            |
| 2                        | 59            | 10               | 38            |
|                          |               | 16               | 62            |
| <b>Peritoneum Points</b> | <b>Points</b> | 20               | 77            |
| No                       | 0             | 24               | 92            |
| Yes                      | 19            | 26               | 100           |

  

| <b>Nomogram Score</b> |                             |                     |                             |
|-----------------------|-----------------------------|---------------------|-----------------------------|
| <b>Total Points</b>   | <b>Predicted 3-month OS</b> | <b>Total Points</b> | <b>Predicted 6-month OS</b> |
| 157                   | 0.02                        | 144                 | 0.001                       |
| 145                   | 0.05                        | 126                 | 0.01                        |
| 133                   | 0.10                        | 107                 | 0.05                        |
| 125                   | 0.15                        | 95                  | 0.10                        |
| 117                   | 0.20                        | 86                  | 0.15                        |
| 111                   | 0.25                        | 79                  | 0.20                        |
| 104                   | 0.30                        | 72                  | 0.25                        |
| 98                    | 0.35                        | 66                  | 0.30                        |
| 92                    | 0.40                        | 60                  | 0.35                        |
| 86                    | 0.45                        | 54                  | 0.40                        |
| 80                    | 0.50                        | 48                  | 0.45                        |
| 73                    | 0.55                        | 41                  | 0.50                        |
| 66                    | 0.60                        | 35                  | 0.55                        |
| 58                    | 0.65                        | 28                  | 0.60                        |
| 50                    | 0.70                        | 20                  | 0.65                        |
| 40                    | 0.75                        | 12                  | 0.70                        |
| 29                    | 0.80                        | 2                   | 0.75                        |
| 15                    | 0.85                        |                     |                             |
